# Supplementary material
Source: PubMed Central journal article supplement (PMC10510034)
Supplement: NIHMS1928677-supplement-Supplementary_Materials.pdf [file NIHMS1928677-supplement-Supplementary_Materials.pdf]

# Supplementary material

Jain et al. *Long read mapping to repetitive reference sequences using Winnowmap2*

---

## Content summary

- **Figure S1:** Visualisation of MCAS read alignments using a simulated ONT read and chr8 reference sequence.
  - **Figure S2:** Visualisation of read alignments using IGV at a locus in centromere of CHM13 chromosome 8.
  - **Figure S3:** Annotation of long near-identical duplications in CHM13 chromosome 8 and X respectively.
  - **Figure S4:** Illustration of MCASs using a DP alignment scoring matrix.
  - **Table S1:** Structural variant accuracy evaluation using chromosome 8 and chromosome X as reference sequences respectively.
  - **Table S2:** Evaluation of read mapping accuracy by comparing mapping coordinates of each read with its simulated origin.
  - **Table S3:** Command line parameters that were used to execute various tools for this study.
  - **Table S4:** Length statistics of simulated and real long read sequencing data sets used in this study.
  - **Note S1:** Time and space complexity to exactly compute minimal confidently alignable substrings (MCASs).
-

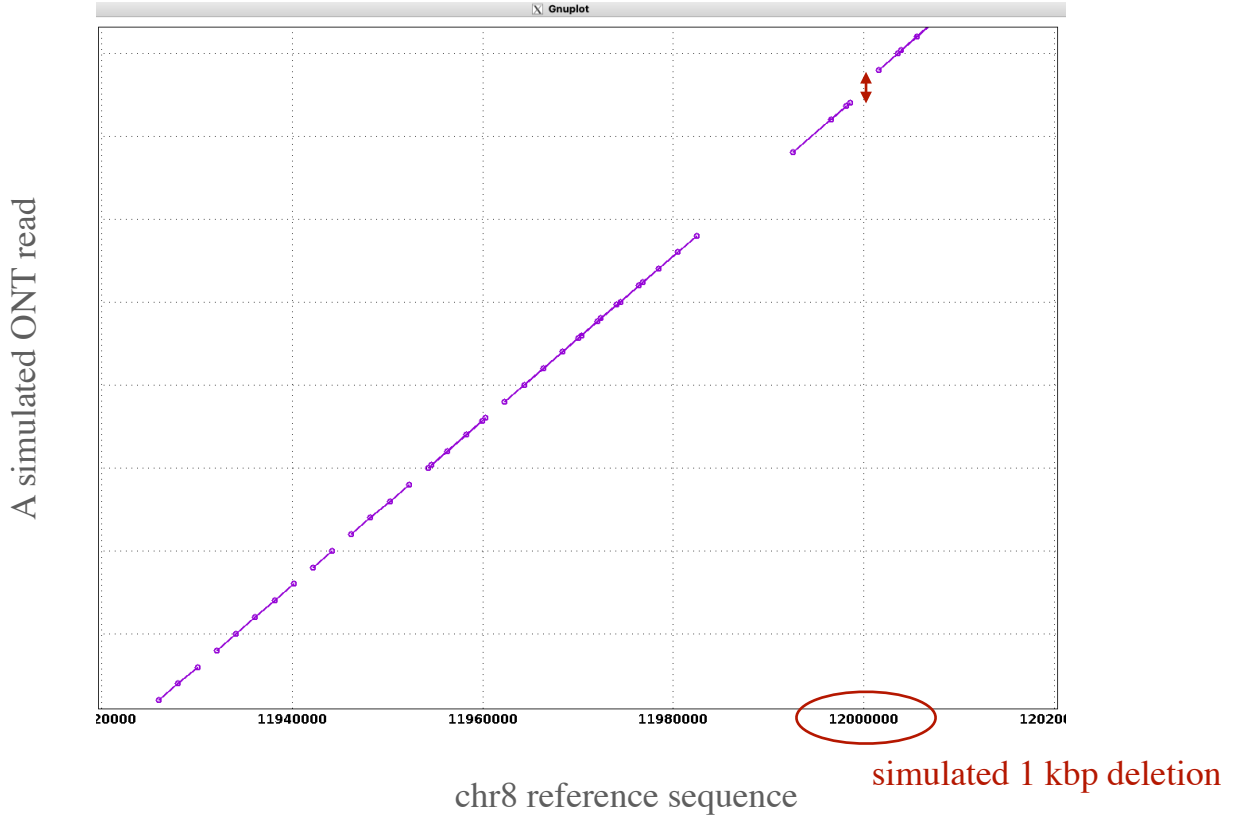

**Fig. S1.** Several MCAS alignments computed by Winnowmap2 are shown for a simulated ONT read using a dot-plot. MCASs surrounding the non-reference SV allele are correctly aligned to the mutated chr8 reference sequence. A purple dot indicates either the start or the end of an MCAS alignment. MCASs can have variable length and can also overlap with each other. These MCAS alignments are joined together in a final step by Winnowmap2.

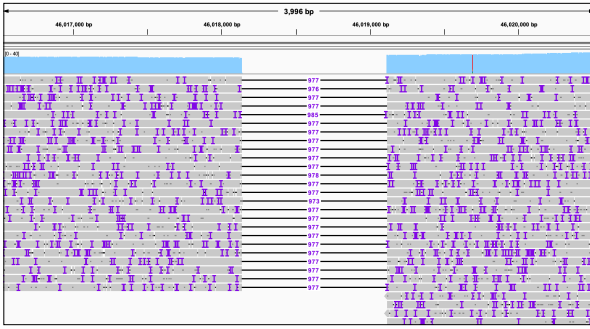

a. WINNOMAP2

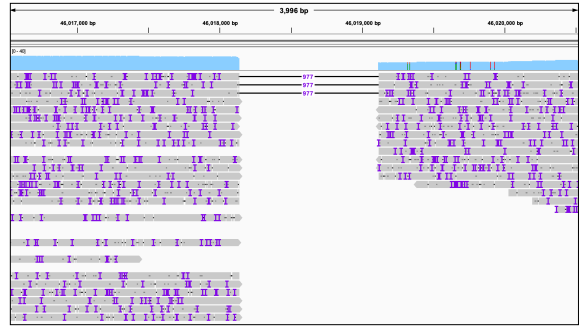

b. MINIMAP2

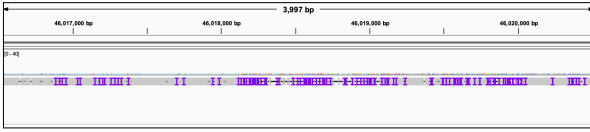

c. NGMLR

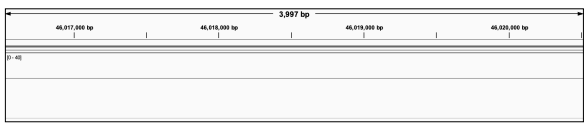

d. GRAPHMAP

**Fig. S2.** IGV visualization of alignment pileup near a simulated deletion SV at locus 46,018,137 bp of chromosome 8. The locus is within the centromeric satellite DNA array of chromosome 8. The sky-blue-colored track on top of each plot shows mapping-coverage using a uniform y-axis scale (0-40). The grey-colored line segments show individual primary read alignments. IGV uses purple markers to indicate presence of indels within read alignments. NGMLR, minimap2, graphmap show reduced coverage due to allelic bias whereas Winnommap2 shows good coverage in this region. Consistent large deletions in the middle of winnowmap2 read alignments are distinctly visible due to simulated SV of size 977 bp.

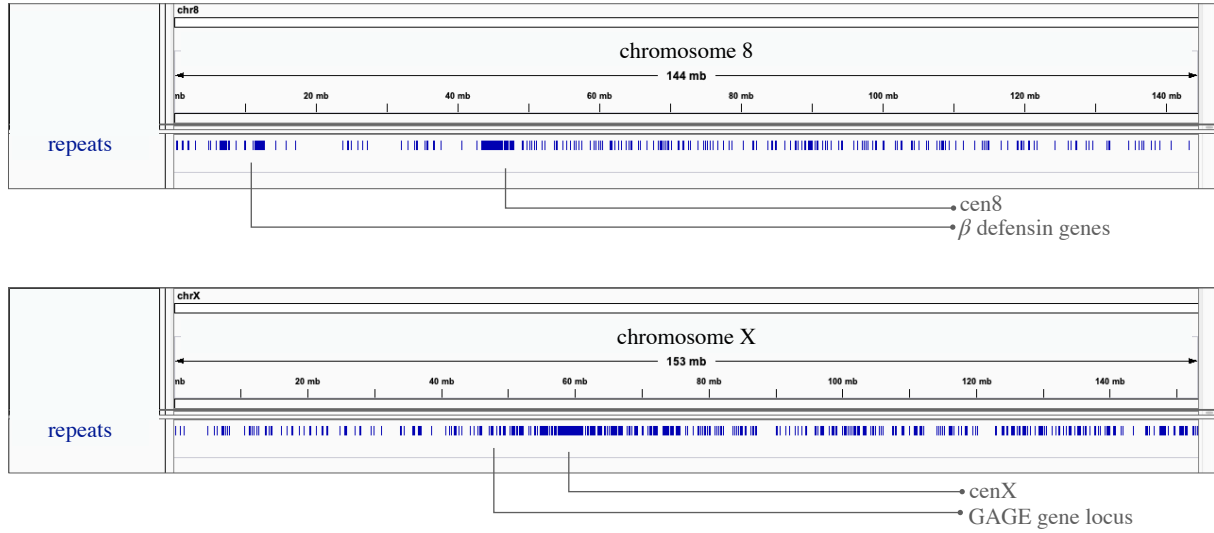

**Fig. S3.** De novo annotation of long near-identical duplications in CHM13 chromosome 8 and X respectively. In each case, these duplications (length  $\geq 10$  kbp, identity  $\geq 95\%$ ) were identified by executing self-alignment of these chromosomes using Mashmap. Mashmap (<https://github.com/marbl/MashMap>) includes a script that generates these intervals in bed format. A few repeat units are also labeled in the above figure.

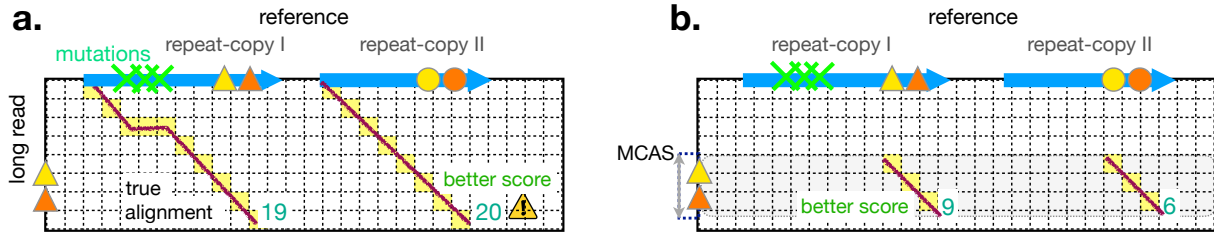

**Fig. S4.** Illustration of MCASs using a DP alignment scoring matrix. Similar to Figure 1 in the main text, PSVs are shown using colored triangle and dot markers. Alignments are annotated with their hypothetical scores. The left figure illustrates the effect of allelic-bias. The score of a true alignment spanning non-reference alleles can be lower compared to the score of an incorrect alignment. On the right side, an MCAS of a read which does not span non-reference alleles can achieve correct and unique placement to a reference. MCASs are subsequently processed during a final consolidation step to obtain correct alignments.

**chromosome 8**, total calls simulated 510/100/490

| <b>Dataset</b> |             | <b>Winnowmap2</b> | <b>Winnowmap</b> | <b>minimap2</b> | <b>NGMLR</b> |
|----------------|-------------|-------------------|------------------|-----------------|--------------|
| hifi 20x       | Total calls | 500/98/479        | 494/85/474       | 492/85/469      | 493/95/454   |
|                | FN calls    | 10/2/11           | 16/15/16         | 18/15/21        | 17/5/36      |
|                | FP calls    | 0/0/0             | 1/0/1            | 3/0/3           | 6/2/0        |
| hifi 40x       | Total calls | 510/100/490       | 503/87/480       | 501/87/475      | 497/97/466   |
|                | FN calls    | 0/0/0             | 7/13/10          | 9/13/15         | 13/3/24      |
|                | FP calls    | 2/0/1             | 5/0/2            | 6/0/4           | 12/4/0       |
| ONT 20x        | Total calls | 502/97/484        | 494/86/478       | 493/85/476      | 479/93/452   |
|                | FN calls    | 8/3/6             | 16/14/12         | 17/15/14        | 31/7/38      |
|                | FP calls    | 0/0/0             | 3/0/2            | 4/0/4           | 2/0/0        |
| ONT 40x        | Total calls | 510/100/489       | 505/88/484       | 502/88/479      | 497/97/468   |
|                | FN calls    | 0/0/1             | 5/12/6           | 8/12/11         | 13/3/22      |
|                | FP calls    | 0/0/1             | 7/1/6            | 8/2/8           | 6/3/0        |

**chromosome X**, total calls simulated 488/100/512

| <b>Dataset</b> |             | <b>Winnowmap2</b> | <b>Winnowmap</b> | <b>minimap2</b> | <b>NGMLR</b> |
|----------------|-------------|-------------------|------------------|-----------------|--------------|
| hifi 20x       | Total calls | 476/98/496        | 470/81/481       | 469/79/482      | 468/96/470   |
|                | FN calls    | 12/2/16           | 18/19/31         | 19/21/30        | 20/4/42      |
|                | FP calls    | 1/1/0             | 4/1/0            | 4/1/0           | 6/6/0        |
| hifi 40x       | Total calls | 485/99/509        | 473/81/493       | 472/80/496      | 471/97/486   |
|                | FN calls    | 3/1/3             | 15/19/19         | 16/20/16        | 17/3/26      |
|                | FP calls    | 3/0/0             | 8/2/0            | 9/3/3           | 14//12/1     |
| ONT 20x        | Total calls | 476/99/507        | 467/83/496       | 467/84/500      | 457/90/475   |
|                | FN calls    | 12/1/5            | 21/17/16         | 21/16/12        | 31/10/37     |
|                | FP calls    | 2/0/1             | 6/1/1            | 7/1/1           | 5/3/1        |
| ONT 40x        | Total calls | 485/99/510        | 480/84/503       | 481/84/507      | 472/97/494   |
|                | FN calls    | 3/1/2             | 8/16/9           | 7/16/5          | 16/3/18      |
|                | FP calls    | 2/0/1             | 8/2/2            | 12/3/2          | 8/9/1        |

**Table S1.** Structural variant accuracy evaluation using chromosome 8 and chromosome X as reference sequences respectively. In this experiment, the following three types of SVs were simulated using SURVIVOR: deletions, inversions and insertions. Accordingly all figures of the form  $x/y/z$  indicate  $x$  deletions,  $y$  inversions and  $z$  insertions respectively. This table provides a detailed breakdown of the plot shown in main text (Figure 3).

| Data set                 | Reference          | Method     | Unmapped reads | Incorrectly mapped reads |
|--------------------------|--------------------|------------|----------------|--------------------------|
| PacBio-CLR (5× coverage) | Human chrX (CHM13) | Winnowmap2 | 0%             | 0.03%                    |
| PacBio-CLR (5× coverage) | Human chrX (CHM13) | minimap2   | 0%             | 0.15%                    |
| PacBio-CLR (5× coverage) | Human WG (GRCh38)  | Winnowmap2 | 0%             | 2.0%                     |
| PacBio-CLR (5× coverage) | Human WG (GRCh38)  | minimap2   | 0%             | 1.9%                     |

**Table S2.** Evaluation of read mapping accuracy by checking the fraction of reads that were incorrectly placed compared to their simulated origin. This experiment repeats the simulated benchmarking method adopted in [11] to test Winnowmap2 and minimap2. Here we simulated PacBio CLR reads with mean error rate of 10% and mean read length of 15 kbp using PBSIM from T2T chromosome assemblies of chromosome X (v0.7) as well as GRCh38 human reference. We used Minimap2’s `paftools` utility to evaluate mapping accuracy. Unlike the experiment conducted using SURVIVOR method, here reads were directly simulated from the sequence on which they are mapped.

| Tool                  | Purpose                   | Command line parameters                                                                                                                                                       |
|-----------------------|---------------------------|-------------------------------------------------------------------------------------------------------------------------------------------------------------------------------|
| Winnowmap2 (v2.03)    | HiFi read mapping         | -W repetitive.k15.txt -ax map-pb --MD ref.fasta hifi.fq.gz                                                                                                                    |
|                       | ONT read mapping          | -W repetitive.k15.txt -ax map-ont --MD ref.fasta ont.fq.gz                                                                                                                    |
| minimap2 (v2.18)      | HiFi read mapping         | -t 24 -ax asm20 --MD ref.fasta hifi.fq.gz                                                                                                                                     |
|                       | ONT read mapping          | -t 24 -ax map-ont --MD ref.fasta ont.fq.gz                                                                                                                                    |
| NGMLR (v0.2.7)        | HiFi read mapping         | -t 24 -r ref.fasta -q hifi.fq.gz -o output.sam                                                                                                                                |
|                       | ONT read mapping          | -t 24 -x ont -r ref.fasta -q ont.fq.gz -o output.sam                                                                                                                          |
| Winnowmap (v1.01)     | HiFi read mapping         | -W repetitive.k19.txt -t 24 -ax asm20 --MD ref.fasta hifi.fq.gz                                                                                                               |
|                       | ONT read mapping          | -W repetitive.k15.txt -t 24 -ax map-ont --MD ref.fasta ont.fq.gz                                                                                                              |
| graphmap (v0.5.2)     | ONT read mapping          | align -r ref.fasta -d ont.fq.gz -o output.sam -t 24                                                                                                                           |
| Sniffles (v1.0.11)    | SV calling                | -n -i -t 8 -m alignments.bam -v output.vcf                                                                                                                                    |
| SURVIVOR (v1.0.6)     | SV simulation             | simSV ref.fasta parameter_file 0 1 alternate                                                                                                                                  |
|                       | SV evaluation             | eval SV.vcf truth.bed 50 results                                                                                                                                              |
| SVanalyzer(v0.36)     | SV evaluation             | SVbenchmark --ref ref.fasta --test test.vcf --truth truth.vcf --includebed giab.bed --testfilter PASS --truthfilter PASS --normdist 1.00 --normsizediff 1.00 --normshift 1.00 |
| PBSIM (commit:e014b1) | HiFi read simulation      | --depth 20 --data-type CLR --accuracy-mean 0.999 --accuracy-min 0.99 --length-min 18000 --length-mean 20000 --length-max 22000 --model-qc model.qc.clr ref.fasta              |
| NanoSim(v2.6.0)       | ONT read simulation       | readanalysis.py genome -i ont.fq.gz -rg ref1.fasta -ga output.sam -t 28 -o train, simulator.py genome -rg ref2.fasta -c train -med 50000 -sd 0.5 -t 28 -n \$NUM               |
| Mashmap (commit:fef4) | Repeat annotation         | mashmap -r ref.fasta -q ref.fasta -f none -s 10000 --pi 95, python denovo_repeat_annotation.py mashmap.out 10000 95 > tmp.bed, bedtools merge -i tmp.bed                      |
| bedtools(v2.29.2)     | Filter SVs within repeats | bedtools intersect -a output.vcf -b repeats.bed -u -wa > repeats.vcf                                                                                                          |

**Table S3.** Command line parameters that were used to execute various tools for this study.

Simulated long reads from T2T chromosomes 8 and X that were used in this study

| <b>Dataset</b>   | <b>Read count</b> | <b>N50</b> | <b>Min. length</b> | <b>Max. Length</b> | <b>Notes</b>         |
|------------------|-------------------|------------|--------------------|--------------------|----------------------|
| HiFi (chr8, 20x) | 146,118           | 19,979     | 18,000             | 22,000             | simulated by PBSIM   |
| HiFi (chr8, 40x) | 292,286           | 19,972     | 18,000             | 22,000             | simulated by PBSIM   |
| HiFi (chrX, 20x) | 154,869           | 19,969     | 18,000             | 22,000             | simulated by PBSIM   |
| HiFi (chrX, 40x) | 309,745           | 19,971     | 18,000             | 22,000             | simulated by PBSIM   |
| ONT (chr8, 20x)  | 51,993            | 63,283     | 8,915              | 369,183            | simulated by NanoSim |
| ONT (chr8, 40x)  | 103,723           | 63,503     | 4,498              | 497,739            | simulated by NanoSim |
| ONT (chrX, 20x)  | 54,073            | 64,260     | 11,076             | 331,049            | simulated by NanoSim |
| ONT (chrX, 40x)  | 110,227           | 63,763     | 1,272              | 342,759            | simulated by NanoSim |

Real human HG002 sequencing data used in this study

| <b>Dataset</b>    | <b>Read count</b> | <b>N50</b> | <b>Min. length</b> | <b>Max. Length</b> | <b>Notes</b>           |
|-------------------|-------------------|------------|--------------------|--------------------|------------------------|
| HiFi (HG002, 35x) | 8,449,287         | 12,885     | 47                 | 30,581             | 15 kbp library         |
| ONT (HG002, 35x)  | 12,563,983        | 50,819     | 1                  | 543,308            | Guppy 3.6.0 PromethION |
| ONT (HG002, 50x)  | 19,328,993        | 50,380     | 1                  | 543,308            | Guppy 3.6.0 PromethION |
| ONT (HG004, 90x)  | 29,319,334        | 48,060     | 1                  | 1,197,859          | Guppy 3.6.0 PromethION |
| ONT (HG007, 45x)  | 4,986,802         | 50,117     | 1                  | 647,447            | Guppy 3.5.1 PromethION |

**Table S4.** Length statistics of simulated and real long read sequencing data sets used in this study.

## Supplementary Note S1

**Lemma 1.** *Computing  $MCAS(i) \forall 0 \leq i < |Q|$  requires  $O(|Q||R|)$  time and  $O(|R|)$  space.*

*Proof.* Assume any appropriate linear or affine gap scoring function is being used. Denote  $p^{\text{th}}$  character in read  $Q$  as  $Q[p]$  and a substring ranging from positions  $p$  to  $q$  as  $Q[p, q]$  with both ends inclusive. Consider the following algorithm to compute  $MCAS(i)$ . Compute semi-global DP alignment of  $Q[i, i + j]$  to reference  $R$  while iterating the variable  $j$  from 0 to  $c$ . Here  $c$  is the maximum length allowed for a valid MCAS. Computing a row of the alignment score table requires  $O(|R|)$  time. As a new row is computed in an iteration, we need to check whether the best-scoring alignment satisfies the confidence criteria, i.e., whether its score compared to the second-best non-overlapping alignment exceeds by a user-specified threshold. Using a method from Waterman and Eggert (PubMed: 2448477), the second-best non-overlapping alignment can be computed in  $O(j^2)$  additional time. Therefore, asymptotic time spent per row is  $O(|R| + j^2)$ . As  $j$  is bounded by the constant  $c$ , asymptotic time spent to compute  $MCAS(i)$  remains  $O(|R|)$ . Therefore, computing all MCASs requires  $O(|Q||R|)$  time. Asymptotic space complexity of the above algorithm is  $O(|R|)$ .  $\square$
